# Supplementary material for: Diagnostic accuracy of procalcitonin, neutrophil-lymphocyte count ratio, C-reactive protein, and lactate in patients with suspected bacterial sepsis
Source: PubMed Central journal article supplement (PMC5519182; doi:10.1371/journal.pone.0181704), 2017-07-20
Supplement: pone.0181704.s005.pdf [file pone.0181704.s005.pdf]

**S3 Table. Performance characteristics of single biomarkers at different cut-offs for diagnosing verified bacterial sepsis using Sepsis-3 criteria.<sup>a</sup>**

| <b>Biomarker (cut-off)</b>  | <b>Sensitivity (95% CI)</b> | <b>Specificity (95% CI)</b> | <b>Accuracy (95% CI)</b> | <b>DOR (95% CI)</b> | <b>PPV (95% CI)</b> | <b>NPV (95% CI)</b> |
|-----------------------------|-----------------------------|-----------------------------|--------------------------|---------------------|---------------------|---------------------|
| <b>PCT (0.1 ng/mL)</b>      | 79.8% (76.5-83.2)           | 41.9% (38.9-44.9)           | 55.4% (53.0-57.9)        | 2.85 (2.24-3.63)    | 43.2% (40.2-46.2)   | 79.0% (75.5-82.4)   |
| <b>PCT (0.5 ng/mL)</b>      | 50.4% (46.2-54.5)           | 74.2% (71.5-76.9)           | 65.7% (63.4-68.1)        | 2.92 (2.35-3.63)    | 51.9% (47.7-56.1)   | 73.0% (70.3-75.7)   |
| <b>PCT (2.0 ng/mL)</b>      | 32.1% (28.3-36.0)           | 89.5% (87.6-91.4)           | 69.1% (66.8-71.4)        | 4.05 (3.10-5.29)    | 62.9% (57.3-68.5)   | 70.5% (68.0-72.9)   |
| <b>PCT (10.0 ng/mL)</b>     | 15.4% (12.4-18.3)           | 97.4% (96.5-98.4)           | 68.2% (65.9-70.5)        | 6.88 (4.38-10.81)   | 76.8% (69.0-84.6)   | 67.5% (65.1-69.9)   |
| <b>CRP (20 mg/L)</b>        | 88.4% (85.8-91.1)           | 14.4% (12.2-16.5)           | 40.8% (38.4-43.3)        | 1.28 (0.93-1.75)    | 36.4% (33.9-39.0)   | 69.0% (62.8-75.4)   |
| <b>CRP (50 mg/L)</b>        | 76.3% (72.7-79.9)           | 31.3% (28.4-34.2)           | 47.4% (44.9-49.9)        | 1.47 (1.16-1.86)    | 38.2% (35.3-41.0)   | 70.4% (66.2-74.7)   |
| <b>CRP (100 mg/L)</b>       | 59.7% (55.6-63.8)           | 53.3% (50.2-56.4)           | 55.6% (53.1-58.1)        | 1.69 (1.37-2.09)    | 41.5% (38.1-44.9)   | 70.4% (67.2-73.7)   |
| <b>Lactate (2.0 mmol/L)</b> | 45.6% (41.4-49.8)           | 69.5% (66.6-72.4)           | 61.0% (58.5-63.4)        | 1.91 (1.54-2.37)    | 45.4% (41.2-49.6)   | 69.7% (66.8-72.5)   |
| <b>Lactate (2.5 mmol/L)</b> | 29.5% (25.7-33.4)           | 84.2% (81.9-86.5)           | 64.6% (62.2-67.1)        | 2.23 (1.73-2.87)    | 51.0% (45.4-56.5)   | 68.2% (65.6-70.9)   |
| <b>Lactate (3.5 mmol/L)</b> | 14.9% (11.9-18.0)           | 95.3% (94.0-96.6)           | 66.6% (64.2-68.9)        | 3.54 (2.43-5.18)    | 63.8% (55.4-72.1)   | 66.8% (64.3-69.3)   |
| <b>Lactate (4.0 mmol/L)</b> | 9.8% (7.3-12.3)             | 97.0% (96.0-98.1)           | 65.8% (63.4-68.2)        | 3.53 (2.22-5.63)    | 64.6% (54.3-75.0)   | 65.9% (63.5-68.4)   |
| <b>NLCR (3.0)</b>           | 95.1% (93.3-96.9)           | 11.7% (9.7-13.7)            | 41.5% (39.1-44.0)        | 2.58 (1.67-3.97)    | 37.5% (35.0-40.0)   | 81.1% (74.7-87.5)   |
| <b>NLCR (10.0)</b>          | 64.7% (60.8-68.7)           | 60.8% (57.9-63.9)           | 62.2% (59.8-64.6)        | 2.85 (2.30-3.54)    | 47.9% (44.3-51.5)   | 75.6% (72.6-78.6)   |
| <b>NLCR (12.0)</b>          | 55.3% (51.2-59.5)           | 69.1% (66.2-72.0)           | 64.2% (61.8-66.6)        | 2.77 (2.23-3.43)    | 49.9% (46.0-53.9)   | 73.5% (70.7-76.4)   |
| <b>NLCR</b>                 | 43.9%                       | 76.4%                       | 64.8%                    | 2.54 (2.03-         | 50.9%               | 71.0%               |

|                    |                      |                      |                      |                  |                      |                      |
|--------------------|----------------------|----------------------|----------------------|------------------|----------------------|----------------------|
| <b>(15.0)</b>      | (39.8-48.1)          | (73.8-79.1)          | (62.4-67.2)          | 3.18)            | (46.4-55.4)          | (68.3-73.7)          |
| <b>NLCR (20.0)</b> | 30.4%<br>(26.6-34.2) | 86.9%<br>(84.8-89.0) | 66.7%<br>(64.3-69.0) | 2.90 (2.24-3.75) | 56.4%<br>(50.8-62.0) | 69.2%<br>(66.6-71.7) |

CRP, C-reactive protein; DOR, diagnostic odds ratio; NLCR, neutrophil-lymphocyte count ratio; NPV, negative predictive value; PCT, procalcitonin; PPV, predictive positive value.

<sup>a</sup>Including all episodes fulfilling the Sepsis-3 criteria for bacterial sepsis irrespective severity (i.e., sepsis and septic shock).
